# Supplementary material for: Does Secretory Clearance Follow Glomerular Filtration Rate in Chronic Kidney Diseases? Reconsidering the Intact Nephron Hypothesis
Source: PubMed Central journal article supplement — Clin Transl Sci. 2017 Jul 4;10(5):395–403. doi: 10.1111/cts.12481 (PMC5593164; doi:10.1111/cts.12481), 2017-07-04
Supplement: CTS-10-395-s002.pdf [file CTS-10-395-s002.pdf]

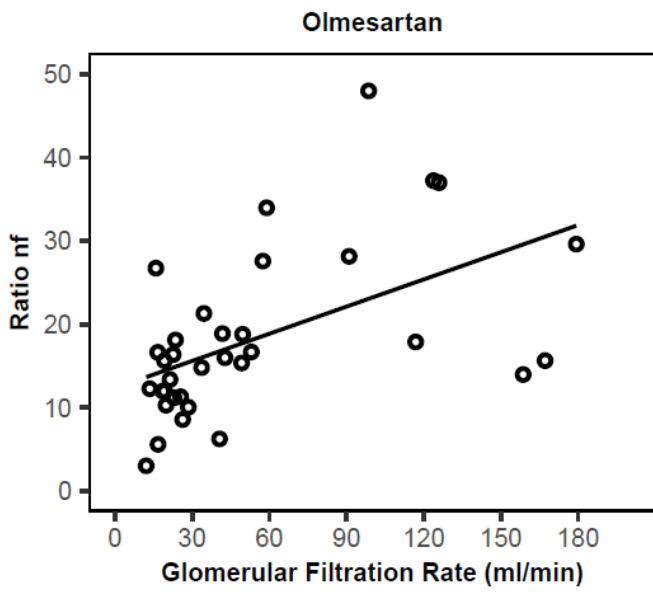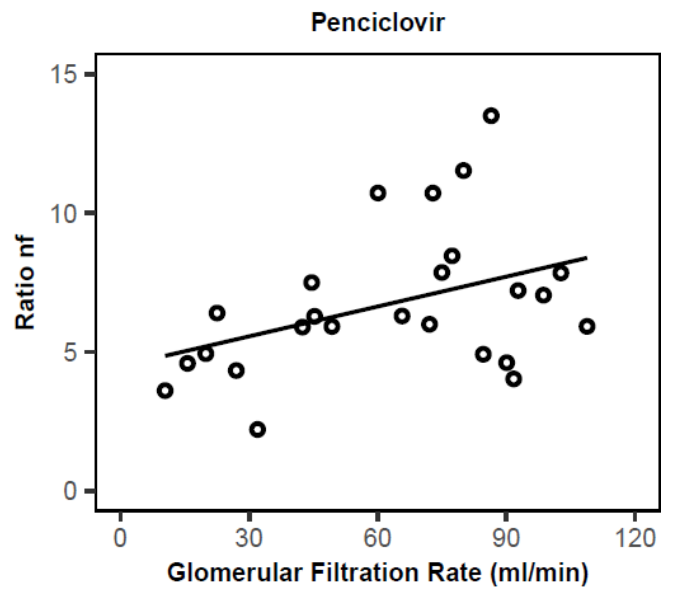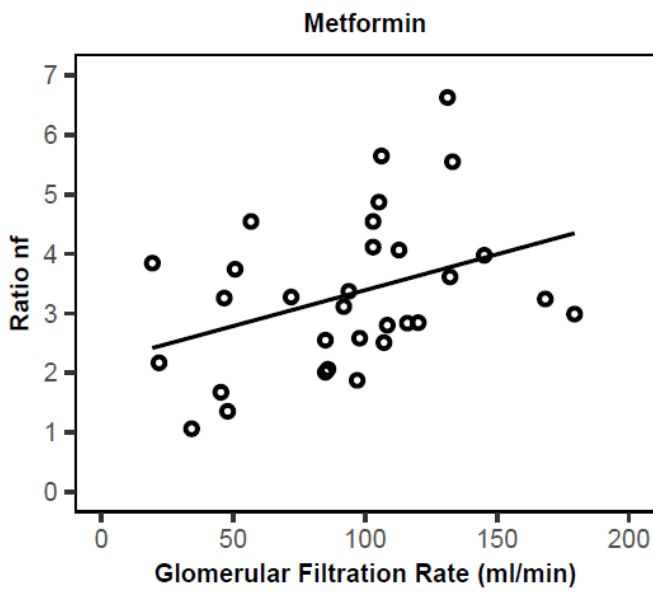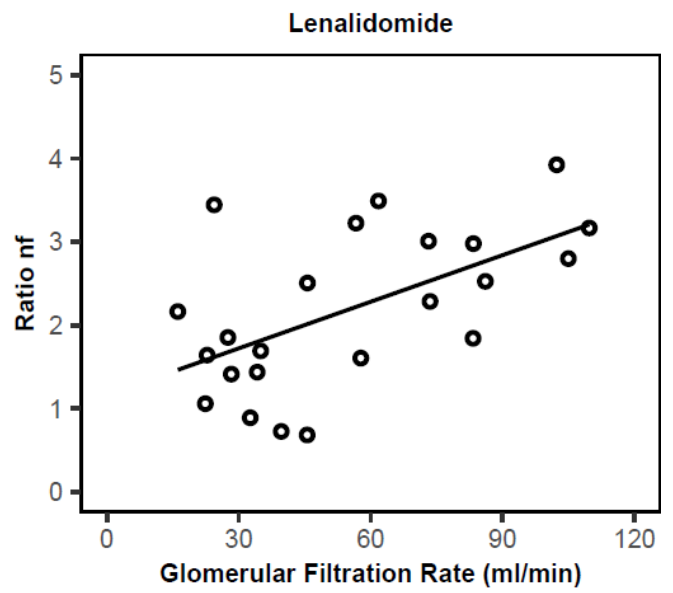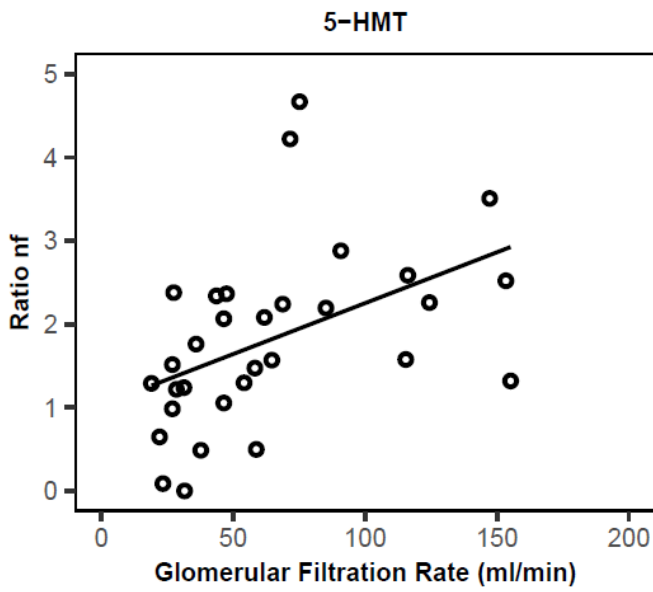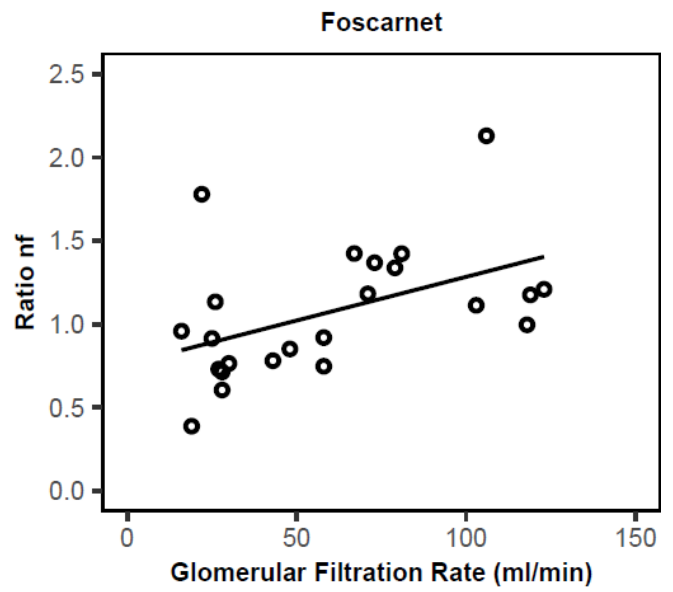

**Figure S2A.** Drugs and solutes with a ratio greater than 0.74 showing decrease in ratio across the range of CKD (Group B).
